# Supplementary material for: Circumpolar Diversity and Geographic Differentiation of mtDNA in the Critically Endangered Antarctic Blue Whale (Balaenoptera musculus intermedia)
Source: PLoS One. 2012 Mar 7;7(3):e32579. doi: 10.1371/journal.pone.0032579 (PMC3296714; doi:10.1371/journal.pone.0032579)
Supplement: Table S1 — (XLSX) [file pone.0032579.s001.xlsx]

## Sheet: Appendix I
Area	1990	1991	1992	1993	1994	1995	1996	1997	1998	1999	2000	2001	2002	2003	2004	2005	2006	2007	2008	2009	Total n
I	1				0						0	4									5
II								5	6												11
III				2		0										4	36	85			127
IV						2				10						1			0	9	22
V			0										16	5	14						40
VI		0					0					18									13
Total	1	0	0	2	0	2	0	4	6	10	0	22	16	5	14	5	36	85	0	9	218

## Sheet: Appendix II
					Estimate		Comparable Area
IWC Area	CP set	Seasons	Long range	Mid-year	N	CV	N	CV
Area I	CPI	1982/83	60	1982/83	25	0.8	25	0.8
(120°W-60°W)	CPII	1989/90	60	1989/90	84	0.91	178	1.03
	CPIII	1993/94	30
		1999/00	20
		2000/01	10	1997/98	88	0.85	88	0.85
Area II	CPI	1981/82	60	1981/82	26	0.81	26	0.81
(60°W-0°)	CPII	1986/87	60	1986/87	126	0.64	158	0.71
	CPIII	1996/97	25
		1997/98	35	1997/98	298	0.55	268	0.58
Area III	CPI	1979/80	70	1979/80	143	0.52	219	0.61
(0°-70°E)	CPII	1987/88	70	1987/88	111	0.79	111	0.79
	CPIII	1992/93	40
		1994/95	30	1993/94	166	0.6	166	0.6
Area IV	CPI	1978/79	60	1978/79	9	1.06	9	1.06
(70°E-130°E)	CPII	1988/89	60	1988/89	0	0	0	0
	CPIII	1994/95	10
		1998/99	50	1997/98	419	0.51	419	0.51
Area V	CPI	1980/81	60	1980/81	73	0.68	110	0.73
(130°E-170°W)	CPII	1985/86	60	1985/86	218	0.75	218	0.75
	CPIII	1991/92	60	1991/92	260	0.56	534	0.61
		2001/02	20
		2002/03	20
		2003/04	20	2002/03	765	0.43	765	0.43
Area VI	CPI	1983/84	50	1983/84	177	0.81	177	0.81
(170°W-120°W)	CPII	1990/91	50	1990/91	21	0.9	21	0.9
	CPIII	1996/97	30
		2000/01	20	1998/99	500	0.68	500	0.68

## Sheet: Appendix III
Haplotype	12	28	30	58		77	78	85	86	87	94	95	102	103	106	110	116	123	125	126	127	129	130	147	167	169	183	189	195	204	205	215	245	258	262	263	268	281	285	286	301	305	306	307	317	328	338	369	464
Z-72896_B	G	G	C	A		T	T	T	T	C	G	T	T	C	C	A	T	G	G	T	T	T	C	C	T	G	C	C	C	C	C	T	T	G	T	A	T	T	G	T	T	C	C	C	T	A	T	T	-
Z-72930_AA	.	.	.	.		.	.	.	.	.	.	.	.	.	T	.	.	.	.	.	.	.	.	.	.	.	.	.	.	.	T	.	C	A	.	.	.	C	A	.	.	T	.	.	.	.	.	.	-
Z-26580_BB	.	.	.	.		.	.	.	.	.	.	.	.	.	.	.	.	.	.	.	.	.	.	.	.	.	.	.	.	.	T	.	C	.	.	.	.	C	A	.	.	T	.	T	.	.	.	.	-
Z-62506_D	A	.	.	.		.	.	.	.	.	.	.	.	.	.	.	.	.	.	.	.	.	.	.	.	.	.	.	.	.	.	.	.	.	.	.	.	.	.	.	.	T	.	.	.	.	.	.	-
Hap_E	.	.	.	.		.	.	.	C	.	.	.	C	.	T	.	.	.	.	.	.	.	.	.	.	.	.	.	.	.	.	.	.	.	.	G	.	.	A	.	.	T	.	.	C	.	.	.	-
Z-72907_F	A	.	.	.		.	.	.	.	.	.	.	.	.	.	.	.	.	.	.	.	.	.	.	.	.	.	.	.	.	.	.	.	.	.	.	.	.	.	.	C	T	.	.	.	.	.	.	-
Z-13944_FF	.	.	.	.		.	.	.	C	T	.	.	.	T	.	.	.	.	.	.	.	.	.	.	.	.	.	.	.	.	.	.	.	A	.	G	.	C	A	.	.	T	.	.	.	.	.	.	-
Z-13945_GG	.	.	.	.		.	.	.	C	.	.	.	.	.	T	.	.	.	.	.	.	.	.	.	.	.	.	.	.	.	T	C	C	.	.	.	.	C	A	.	.	T	.	.	.	.	.	.	-
Z-62475_H	.	.	.	.		.	.	.	.	.	.	.	.	.	.	.	.	.	.	.	.	.	.	.	.	.	.	.	.	.	.	.	.	.	.	G	.	C	.	.	.	.	.	.	.	.	.	.	-
Z-13948_HH	.	.	.	.		.	.	C	.	.	.	.	.	T	.	.	.	.	.	.	.	.	.	.	.	.	.	.	.	.	.	.	.	.	.	G	.	C	A	.	.	T	.	.	.	.	.	.	-
Z-62489_I	.	.	.	.		.	.	.	.	.	.	.	.	T	.	.	.	.	.	.	.	.	.	.	.	.	.	.	.	.	T	.	C	.	.	.	.	C	A	.	.	T	.	.	.	.	.	.	-
Z-7341_J	.	.	.	.		.	.	.	C	T	.	.	.	T	.	.	.	.	.	.	.	.	.	.	.	.	.	.	.	.	.	.	.	.	.	.	.	.	A	.	.	T	.	.	.	.	.	.	-
Z-7619_K	.	.	.	.		.	.	.	C	T	.	.	.	T	.	G	.	.	.	.	.	.	.	.	.	.	.	.	.	.	.	.	.	.	.	.	.	.	A	.	.	T	.	.	.	.	.	.	-
Z-88260_L	.	.	.	.		.	.	.	C	.	.	.	.	T	.	.	.	.	.	.	.	.	.	.	.	.	.	.	.	.	.	.	C	.	.	.	.	C	A	.	.	T	.	.	.	.	.	.	-
Z-7622_M	.	.	.	.		.	.	.	.	.	.	.	.	T	T	.	C	.	.	.	.	.	.	.	.	.	.	.	.	.	.	.	.	.	.	.	.	C	.	.	.	T	.	.	.	.	.	.	-
Z-13949_N	.	.	.	.		.	.	.	.	.	.	.	C	.	T	.	.	.	.	.	.	.	.	.	.	.	.	.	.	.	.	.	.	.	.	G	C	.	A	.	.	T	.	.	.	.	.	.	-
Z-26574_NN	.	.	.	.		.	.	.	C	.	.	.	.	G	.	.	.	.	.	.	.	.	.	.	.	.	.	.	.	.	.	C	.	.	.	.	.	C	.	.	.	T	.	.	.	.	.	.	-
Z-26578_OO	.	.	.	.		.	.	.	.	.	A	.	.	T	T	.	C	.	.	.	.	.	.	.	.	.	.	.	.	.	.	.	.	.	.	.	.	C	.	.	.	T	.	.	.	.	.	.	-
Z-11165_R	.	.	.	.		.	.	.	.	.	.	.	.	.	.	.	.	.	.	.	.	.	.	.	.	.	.	.	.	.	.	.	.	.	.	.	.	.	.	.	.	T	.	.	.	.	.	.	-
Z-26589_RR	.	.	.	.		.	.	.	.	.	.	.	.	.	T	.	.	.	.	.	.	.	.	.	.	.	.	.	.	.	.	.	.	.	.	.	.	.	.	C	.	T	.	.	.	.	.	.	-
Z-26590_SS	.	.	T	.		.	.	.	.	.	.	.	.	.	T	.	.	.	A	.	.	C	.	.	.	.	.	.	.	.	T	.	C	.	.	.	.	C	A	.	.	T	.	.	.	.	.	.	-
Z-26594_TT	.	.	.	.		.	.	.	C	.	.	.	C	.	T	.	.	.	.	.	.	.	.	.	.	.	.	.	.	.	.	.	.	.	.	G	C	.	A	.	.	T	.	.	C	.	.	.	-
Z-11164_U	.	.	.	.		.	.	.	.	.	.	.	.	T	.	.	.	.	.	.	.	.	.	.	.	.	.	.	.	.	.	.	.	.	.	.	.	.	.	.	.	T	.	.	.	.	.	.	-
Z-51475_UU	.	.	.	.		.	.	.	.	.	.	.	.	.	T	.	.	.	.	.	.	.	.	.	.	.	.	.	.	.	T	.	C	.	.	.	.	C	A	.	.	T	.	.	.	.	.	.	-
Z-26586_V	.	.	.	.		C	.	.	.	.	.	.	.	.	T	.	.	.	A	C	C	.	T	.	C	.	.	T	.	.	T	.	.	.	C	G	C	.	.	.	.	T	.	.	.	.	.	.	-
Hap_X	.	.	.	.		.	.	.	.	.	.	.	.	T	T	.	C	.	.	.	.	.	.	.	.	.	.	.	.	.	.	.	.	.	.	G	.	C	.	.	.	T	.	.	.	.	.	.	-
Z-51451_Y	.	.	.	.		.	.	.	.	.	.	.	.	.	.	G	.	.	.	.	.	.	.	.	.	.	.	.	.	.	.	C	.	.	.	.	.	C	A	.	.	T	.	.	.	.	.	.	-
Z-26591_Z	.	.	T	.		.	.	.	.	.	.	.	.	.	T	.	.	.	.	.	.	C	.	.	.	.	.	.	.	.	T	.	C	.	.	.	.	C	A	.	.	T	.	.	.	.	.	.	-
Z-13951	.	.	.	.		.	.	.	.	.	.	.	.	.	.	.	.	.	.	.	.	.	.	.	.	.	.	.	.	.	.	.	.	.	.	G	.	C	A	.	C	T	.	.	.	.	.	.	G
Z-51460	.	A	.	.		.	.	C	.	.	.	.	.	.	.	.	.	.	.	.	.	.	.	.	.	.	.	.	.	.	.	.	C	.	.	.	.	.	.	.	.	T	.	.	.	.	.	.	A
Z-51470	.	.	.	.		.	.	.	.	.	.	.	.	.	.	.	.	.	.	.	.	.	.	.	.	.	T	.	A	.	.	.	.	.	C	G	.	.	.	.	.	.	.	.	.	.	.	.	A
Z-51472	.	.	.	.		.	.	.	C	.	.	.	.	.	.	.	.	.	.	.	.	.	.	.	.	.	.	.	.	.	.	C	.	.	.	.	.	.	A	.	.	T	.	.	.	.	.	.	.
Z-51480	.	.	.	.	.	.	C	.	.	.	.	.	.	.	T	.	.	.	.	.	.	.	.	.	.	.	.	.	.	.	.	.	.	.	.	.	.	.	.	.	.	T	.	.	.	.	.	.	A
Z-51481	.	.	.	.		.	.	.	.	.	.	.	.	T	.	.	.	.	.	.	C	.	.	.	.	.	.	.	.	.	.	.	.	.	C	G	.	.	A	.	.	T	.	.	.	.	.	.	.
Z-51486	A	.	.	.		.	.	C	.	.	.	.	.	.	.	.	.	.	.	.	.	.	.	T	.	.	.	.	.	.	.	.	.	.	.	.	.	.	.	.	.	T	.	.	.	.	.	.	A
Z-51488	.	.	.	.		.	.	.	C	T	.	.	.	T	.	.	.	.	.	.	.	.	.	T	.	.	.	.	.	.	.	.	.	.	.	.	.	.	A	.	.	T	.	.	.	G	.	C	A
Z-62481	.	.	.	.		.	.	.	C	.	.	.	.	.	.	.	.	.	.	.	.	.	.	.	.	.	.	.	.	T	.	C	.	.	.	.	.	.	A	.	.	T	.	.	.	.	.	.	.
Z-62482	.	.	.	.		.	.	.	.	.	.	.	.	T	T	.	C	A	.	.	.	.	.	.	.	.	.	.	.	.	T	.	.	.	.	G	.	C	.	.	.	T	.	.	.	.	.	.	.
Z-62487	.	.	.	.		.	.	.	.	.	.	C	.	.	.	.	.	.	.	.	.	.	.	.	.	.	.	.	.	.	T	.	C	.	.	.	C	C	.	.	.	T	.	.	.	.	.	.	A
Z-72906	A	.	.	.		.	.	.	.	.	.	.	.	.	.	.	.	.	.	.	.	.	.	.	.	.	.	.	.	.	.	.	.	.	C	.	.	.	.	.	.	T	.	.	.	.	.	.	A
Z-72910	.	.	.	.		.	.	.	.	.	.	.	.	T	T	.	C	.	.	.	.	.	.	.	.	.	.	.	.	.	.	.	.	.	.	.	.	C	A	.	.	T	.	.	.	.	.	.	.
Z-72912	.	.	.	.		.	C	.	.	.	.	.	.	.	.	.	.	.	.	.	.	.	.	.	.	.	.	.	.	.	.	.	.	.	.	.	.	C	.	.	.	T	.	.	.	.	.	.	A
Z-72916	.	.	.	.		C	.	.	.	.	.	.	.	.	.	.	.	.	A	.	C	.	T	.	C	.	.	T	.	.	T	.	.	.	C	G	.	.	A	.	.	T	T	.	.	.	C	.	A
Z-72917	.	.	.	.		.	.	.	.	.	.	.	C	.	.	.	.	.	.	.	.	.	.	.	.	.	.	.	.	.	T	.	C	.	.	.	.	C	.	.	.	T	.	.	.	.	.	.	A
Z-72929	.	.	.	.		.	.	.	.	.	.	.	.	T	T	.	.	.	.	.	.	.	.	.	.	.	T	.	.	.	.	.	.	.	.	.	.	.	A	.	.	T	.	.	.	.	.	.	.
Z-72931	.	.	.	.		.	.	.	.	.	.	.	.	.	.	.	.	A	.	.	.	.	.	.	.	.	.	.	.	.	T	.	C	.	.	.	.	C	A	.	.	T	.	.	.	.	.	.	A
Z-72935	.	.	.	G		.	.	.	.	.	.	.	.	T	.	.	.	.	.	.	.	.	.	.	.	.	.	.	.	.	.	.	.	.	.	.	.	.	.	.	.	T	.	.	.	.	.	.	A
Z-72943	A	.	.	.		.	.	.	.	.	.	.	.	.	.	.	.	.	.	.	.	.	.	.	.	.	.	.	.	.	T	.	.	.	.	.	.	.	.	.	.	T	.	.	.	.	.	.	A
Z-72949	.	.	.	.		.	.	.	.	.	.	.	.	T	.	.	.	.	.	.	.	.	.	.	.	.	A	.	.	.	T	.	C	.	.	.	.	C	A	.	.	T	.	.	.	.	.	.	A
Z-62480**	.	.	.	.		.	.	.	.	.	.	.	.	.	.	.	.	.	.	.	.	.	.	.	.	.	.	.	.	.	T	.	C	.	.	.	.	C	A	.	.	T	.	.	.	.	.	.	.
Z-51461	.	.	.	.		.	.	.	.	.	.	.	.	.	.	.	.	.	.	.	.	.	.	.	.	.	.	.	.	.	T	.	C	.	.	.	.	C	A	.	.	T	.	.	.	.	.	.	A
[truncated: 2 more columns]
